# Supplementary material for: Nano-Biochar Suspension Mediated Alterations in Yield and Juice Quality of Kinnow (Citrus reticulata L.)
Source: MDPI journal article supplement (doi:10.3390/horticulturae9050521), 2023-04-22
Supplement: s1 [file s1]

Archive with 1 entries (1 files):
- horticulturae-2293017-supplementary.pdf
