# Supplementary material for: Nano-Biochar Suspension Mediated Alterations in Yield and Juice Quality of Kinnow (Citrus reticulata L.)
Source: MDPI journal article supplement (doi:10.3390/horticulturae9050521), 2023-04-22
Supplement: s1 [file s1 › horticulturae-2293017-supplementary.pdf]

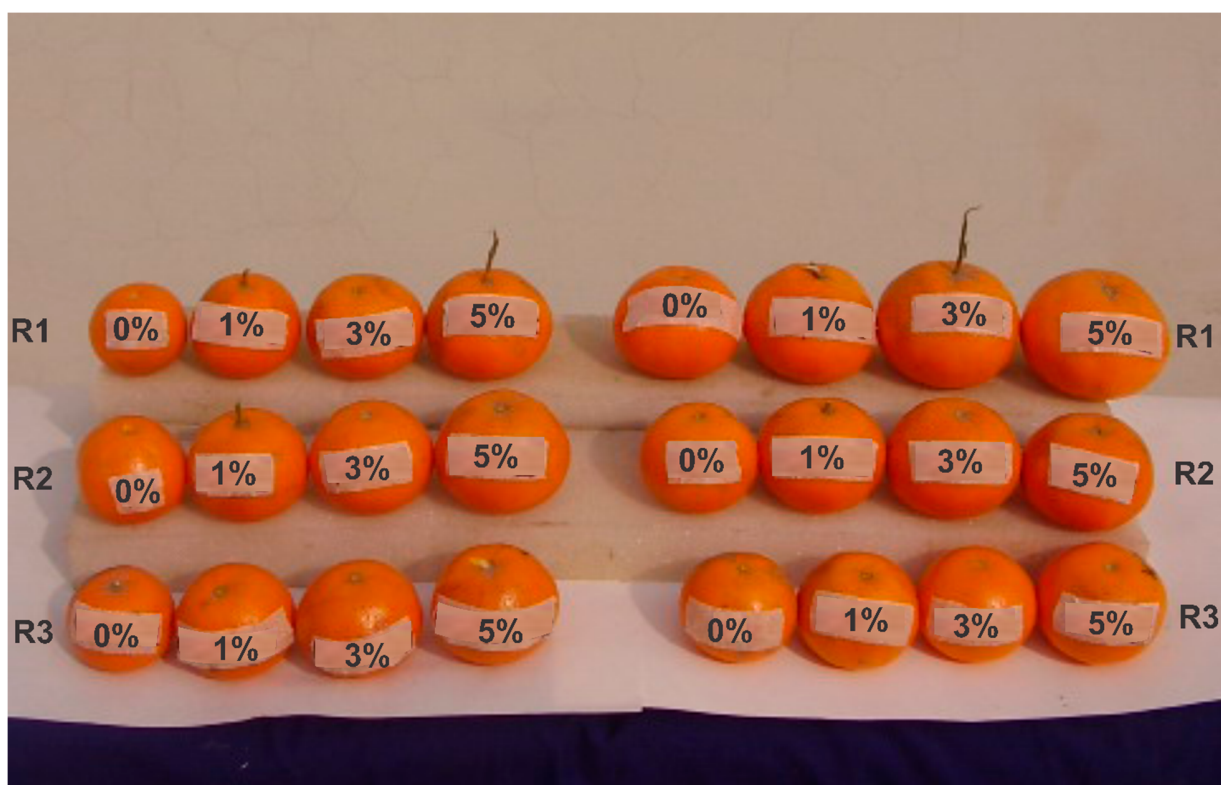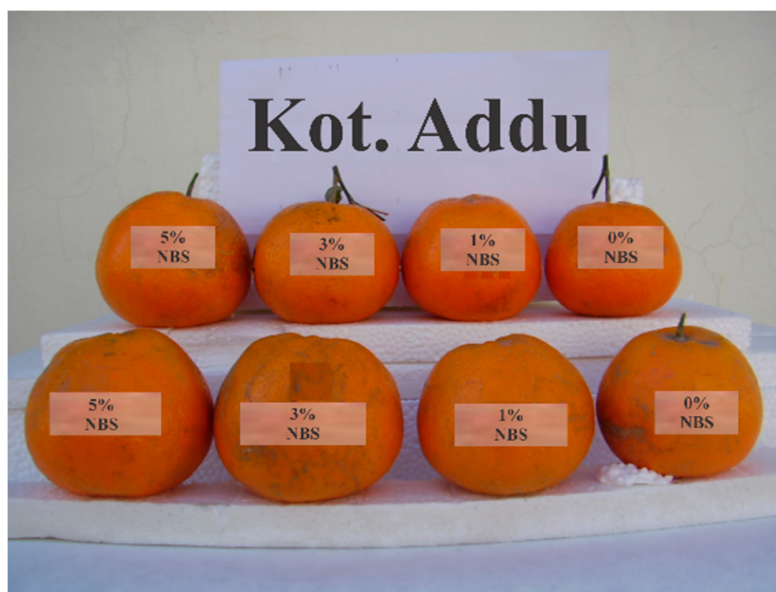

**Figure S1.** Effect of different concentrations of nanobiochar suspension (NBS), i.e., 0 (with H<sub>2</sub>O spray or control), 1%, 3% and 5% foliar application on citrus fruits (orchard located in Kot. Addu, Punjab, Pakistan). R1, R2 and R3 represents samples collected from replication 1, replication 2 and replication 3 at 0%, 1%, 3% and 5% NBS application.
